# Supplementary material for: Architectural proteins Pita, Zw5,and ZIPIC contain homodimerization domain and support specific long-range interactions in Drosophila
Source: PubMed Central journal article supplement — Nucleic Acids Res. 2016 May 2;44(15):7228–41. doi: 10.1093/nar/gkw371 (PMC5009728; doi:10.1093/nar/gkw371), 2016-05-02
Supplement: supp_gkw371_nar-03422-m-2015-File010.pdf [file supp_gkw371_nar-03422-m-2015-File010.pdf]

**Supplementary Table 2. Analysis of localization of Pita/ZIPIC/Zw5 in comparison with TADs in the Hi-C map.**

(A) Proportions of peaks falling into inter-TADs and TADs (data on four cell lines). To avoid partial overlaps between TADs and inter-TADs, the inter-TAD regions were explicitly subtracted from TADs. The overlaps with peaks for TADs and inter-TADs are comparable, but the total length of inter-TADs is nearly half smaller than that of TADs.

(B) Observed and expected proportions of peaks falling into inter-TADs of a given total length (relative to the total mappable genome size). Binomial P-value for peaks-in-interTADs enrichment (chance to observe no less than the given number of peaks in interTADs of the fixed total length and fixed total peaks count for a particular TF).

(A)

|       |       | Cell line |           |       |           |      |           |      |           |
|-------|-------|-----------|-----------|-------|-----------|------|-----------|------|-----------|
|       |       | Bg3       |           | Kc167 |           | OSC  |           | S2   |           |
| TF    | peaks | TAD       | inter-TAD | TAD   | inter-TAD | TAD  | inter-TAD | TAD  | inter-TAD |
| CP190 | 7960  | 0,48      | 0,51      | 0,51  | 0,48      | 0,49 | 0,50      | 0,53 | 0,46      |
| Pita  | 1845  | 0,41      | 0,54      | 0,45  | 0,50      | 0,41 | 0,54      | 0,47 | 0,48      |
| ZIPIC | 575   | 0,24      | 0,63      | 0,30  | 0,57      | 0,22 | 0,65      | 0,30 | 0,58      |
| Zw5   | 695   | 0,27      | 0,66      | 0,34  | 0,58      | 0,30 | 0,62      | 0,35 | 0,57      |

(B)

|       |       | Cell line     |                 |                 |                 |               |                 |              |                 |
|-------|-------|---------------|-----------------|-----------------|-----------------|---------------|-----------------|--------------|-----------------|
|       |       | Bg3 inter-TAD |                 | Kc167 inter-TAD |                 | OSC inter-TAD |                 | S2 inter-TAD |                 |
| TF    | peaks | fraction      |                 | fraction        |                 | fraction      |                 | fraction     |                 |
| CP190 | 7960  | 0,51          | 0,36            | 0,48            | 0,34            | 0,50          | 0,36            | 0,46         | 0,32            |
| Pita  | 1845  | 0,54          | 0,36            | 0,50            | 0,34            | 0,54          | 0,36            | 0,48         | 0,32            |
| ZIPIC | 575   | 0,63          | 0,36            | 0,57            | 0,34            | 0,65          | 0,36            | 0,58         | 0,32            |
| Zw5   | 695   | 0,66          | 0,36            | 0,58            | 0,34            | 0,62          | 0,36            | 0,57         | 0,32            |
|       |       | observed      | <i>expected</i> | observed        | <i>expected</i> | observed      | <i>expected</i> | observed     | <i>expected</i> |

|       |       | Cell line     |          |                 |          |               |          |              |          |
|-------|-------|---------------|----------|-----------------|----------|---------------|----------|--------------|----------|
|       |       | Bg3 inter-TAD |          | Kc167 inter-TAD |          | OSC inter-TAD |          | S2 inter-TAD |          |
| TF    | peaks | count         | P-value  | count           | P-value  | count         | P-value  | count        | P-value  |
| CP190 | 7960  | 4053          | 0,00E+00 | 3807            | 0,00E+00 | 3988          | 0,00E+00 | 3690         | 0,00E+00 |
| Pita  | 1845  | 1000          | 0,00E+00 | 922             | 0,00E+00 | 988           | 0,00E+00 | 893          | 0,00E+00 |
| ZIPIC | 575   | 363           | 0,00E+00 | 328             | 0,00E+00 | 371           | 0,00E+00 | 331          | 0,00E+00 |
| Zw5   | 695   | 456           | 0,00E+00 | 406             | 0,00E+00 | 434           | 0,00E+00 | 397          | 0,00E+00 |

| cell line | total inter-TAD length | genome fraction |
|-----------|------------------------|-----------------|
| Bg3       | 43660000               | 0,364           |
| Kc167     | 40560000               | 0,338           |
| OSC       | 43060000               | 0,359           |
| S2        | 38920000               | 0,324           |
