# Supplementary material for: Architectural proteins Pita, Zw5,and ZIPIC contain homodimerization domain and support specific long-range interactions in Drosophila
Source: PubMed Central journal article supplement — Nucleic Acids Res. 2016 May 2;44(15):7228–41. doi: 10.1093/nar/gkw371 (PMC5009728; doi:10.1093/nar/gkw371), 2016-05-02
Supplement: supp_gkw371_nar-03422-m-2015-File011.pdf [file supp_gkw371_nar-03422-m-2015-File011.pdf]

**Supplementary Table 3. Analysis of localization of Pita/ZIPIC/Zw5 TAD boundaries.**

(A) Proportions of regions from a given set (rows) that overlap regions from another set (columns). Sets of regions: ChIP-Seq peaks (Pita, ZIPIC, Zw5) and TAD boundaries (four cell lines). TAD boundaries were taken by be at +/- 20 or +/-10 kb from TAD start and TAD end coordinates.

(B) Proportions of peaks found within +/- 10 kb TAD boundaries. Binomial P-value for peaks-in-TAD-boundaries enrichment (chance to observe no less than the given number of peaks within TAD boundaries of fixed total length and fixed total peaks count for a particular TF).

(A)

|                           |       |       |      |       |      | TAD boundaries of +/-20kb |       |      |      |
|---------------------------|-------|-------|------|-------|------|---------------------------|-------|------|------|
| dataset                   |       | peaks | Pita | ZIPIC | Zw5  | Bg3                       | Kc167 | OSC  | S2   |
| Pita                      |       | 1845  |      |       |      | 0,44                      | 0,43  | 0,44 | 0,43 |
| ZIPIC                     |       | 575   |      |       |      | 0,50                      | 0,47  | 0,49 | 0,47 |
| Zw5                       |       | 695   |      |       |      | 0,53                      | 0,50  | 0,49 | 0,49 |
| TAD boundaries of +/-20kb | Bg3   | 752   | 0,64 | 0,29  | 0,35 |                           |       |      |      |
|                           | Kc167 | 730   | 0,64 | 0,28  | 0,34 |                           |       |      |      |
|                           | OSC   | 752   | 0,62 | 0,29  | 0,34 |                           |       |      |      |
|                           | S2    | 721   | 0,64 | 0,28  | 0,31 |                           |       |      |      |

|                           |       |       |      |       |      | TAD boundaries of +/-10kb |       |      |      |
|---------------------------|-------|-------|------|-------|------|---------------------------|-------|------|------|
| dataset                   |       | peaks | Pita | ZIPIC | Zw5  | Bg3                       | Kc167 | OSC  | S2   |
| Pita                      |       | 1845  |      |       |      | 0,25                      | 0,25  | 0,25 | 0,23 |
| ZIPIC                     |       | 575   |      |       |      | 0,28                      | 0,28  | 0,29 | 0,25 |
| Zw5                       |       | 695   |      |       |      | 0,31                      | 0,31  | 0,28 | 0,29 |
| TAD boundaries of +/-10kb | Bg3   | 851   | 0,41 | 0,16  | 0,20 |                           |       |      |      |
|                           | Kc167 | 822   | 0,42 | 0,17  | 0,21 |                           |       |      |      |
|                           | OSC   | 832   | 0,41 | 0,17  | 0,20 |                           |       |      |      |
|                           | S2    | 808   | 0,39 | 0,15  | 0,19 |                           |       |      |      |

(B)

|       |       | TAD boundaries of +/-10kb |          |          |          |          |          |          |          |
|-------|-------|---------------------------|----------|----------|----------|----------|----------|----------|----------|
|       |       | Bg3                       |          | Kc167    |          | OSC      |          | S2       |          |
| TF    | peaks | fraction                  |          | fraction |          | fraction |          | fraction |          |
| Pita  | 1845  | 0,25                      | 0,14     | 0,25     | 0,14     | 0,25     | 0,14     | 0,23     | 0,13     |
| ZIPIC | 575   | 0,28                      | 0,14     | 0,28     | 0,14     | 0,29     | 0,14     | 0,25     | 0,13     |
| Zw5   | 695   | 0,31                      | 0,14     | 0,31     | 0,14     | 0,28     | 0,14     | 0,29     | 0,13     |
|       |       | observed                  | expected | observed | expected | observed | expected | observed | expected |

|       |       | TAD boundaries of +/-10kb |          |       |          |       |          |       |          |
|-------|-------|---------------------------|----------|-------|----------|-------|----------|-------|----------|
|       |       | Bg3                       |          | Kc167 |          | OSC   |          | S2    |          |
| TF    | peaks | count                     | P-value  | count | P-value  | count | P-value  | count | P-value  |
| CP190 | 7960  | 1870                      | 0,00E+00 | 1839  | 0,00E+00 | 1801  | 0,00E+00 | 1770  | 0,00E+00 |
| Pita  | 1845  | 454                       | 0,00E+00 | 458   | 0,00E+00 | 461   | 0,00E+00 | 418   | 0,00E+00 |
| ZIPIC | 575   | 160                       | 0,00E+00 | 163   | 0,00E+00 | 164   | 0,00E+00 | 145   | 3,42E-14 |
| Zw5   | 695   | 212                       | 0,00E+00 | 214   | 0,00E+00 | 197   | 0,00E+00 | 200   | 0,00E+00 |

| cell line | total TAD boundaries length | genome fraction |
|-----------|-----------------------------|-----------------|
| Bg3       | 16980000                    | 0,142           |
| Kc167     | 16420000                    | 0,137           |
| OSC       | 16620000                    | 0,139           |
| S2        | 16130000                    | 0,134           |
