# Supplementary material for: Architectural proteins Pita, Zw5,and ZIPIC contain homodimerization domain and support specific long-range interactions in Drosophila
Source: PubMed Central journal article supplement — Nucleic Acids Res. 2016 May 2;44(15):7228–41. doi: 10.1093/nar/gkw371 (PMC5009728; doi:10.1093/nar/gkw371), 2016-05-02
Supplement: supp_gkw371_nar-03422-m-2015-File012.pdf [file supp_gkw371_nar-03422-m-2015-File012.pdf]

**Supplementary Table 4. Analysis of TADs flanked by ChIP-Seq peaks of any studied TFs (i.e. having a ChIP-Seq peak of Pita or Zw5 or ZIPIC at both boundaries).**

(A) Summarized data on all TAD boundaries flanked by sites of any studied TF.

(B, C) Detailed analysis for (B) +/- 20 kb and (C) +/- 10 kb TAD boundaries. The left and right parts of the table show the numbers of flanked TADs and their proportions relative to the total numbers of TADs (indicated in parentheses). Rows and columns: TF ChIP-Seq peak sets. Values in rows refer to TADs with peaks; in columns, to TFs found on the opposite TAD boundaries. Values in "any" column refer to ChIP-Seq peaks of any TF studied.

**(A) TAD boundaries of +/-20kb**

| cell line | total TADs | flanked TADs | proportion of flanked TADs (from total) |
|-----------|------------|--------------|-----------------------------------------|
| Bg3       | 580        | 345          | 0,594828                                |
| Kc167     | 582        | 340          | 0,584192                                |
| OSC       | 577        | 337          | 0,584056                                |
| S2        | 583        | 329          | 0,564323                                |

**TAD boundaries of +/-10kb**

| cell line | total TADs | flanked TADs | proportion of flanked TADs (from total) |
|-----------|------------|--------------|-----------------------------------------|
| Bg3       | 580        | 177          | 0,30517241                              |
| Kc167     | 582        | 195          | 0,33505155                              |
| OSC       | 577        | 184          | 0,31889081                              |
| S2        | 583        | 166          | 0,28473413                              |

**(B) TAD boundaries of +/-20kb**

|             | TF    | TAD count |      |       |     | TAD proportion (from total) |      |       |      |
|-------------|-------|-----------|------|-------|-----|-----------------------------|------|-------|------|
|             |       | any       | Pita | ZIPIC | Zw5 | any                         | Pita | ZIPIC | Zw5  |
| Bg3 (580)   | Pita  | 330       | 240  | 178   | 213 | 0,57                        | 0,41 | 0,31  | 0,37 |
|             | ZIPIC | 201       | 178  | 53    | 98  | 0,35                        | 0,31 | 0,09  | 0,17 |
|             | Zw5   | 237       | 213  | 98    | 61  | 0,41                        | 0,37 | 0,17  | 0,11 |
|             | Pita  | 329       | 223  | 179   | 212 | 0,57                        | 0,38 | 0,31  | 0,36 |
| Kc167 (582) | ZIPIC | 198       | 179  | 49    | 105 | 0,34                        | 0,31 | 0,08  | 0,18 |
|             | Zw5   | 243       | 212  | 105   | 65  | 0,42                        | 0,36 | 0,18  | 0,11 |
|             | Pita  | 320       | 228  | 167   | 198 | 0,55                        | 0,40 | 0,29  | 0,34 |
| OSC (577)   | ZIPIC | 193       | 167  | 55    | 101 | 0,33                        | 0,29 | 0,10  | 0,18 |
|             | Zw5   | 229       | 198  | 101   | 61  | 0,40                        | 0,34 | 0,18  | 0,11 |
|             | Pita  | 319       | 233  | 171   | 199 | 0,55                        | 0,40 | 0,29  | 0,34 |
| S2 (583)    | ZIPIC | 188       | 171  | 46    | 85  | 0,32                        | 0,29 | 0,08  | 0,15 |
|             | Zw5   | 221       | 199  | 85    | 50  | 0,38                        | 0,34 | 0,15  | 0,09 |
|             | Pita  | 319       | 233  | 171   | 199 | 0,55                        | 0,40 | 0,29  | 0,34 |

**(C) TAD boundaries of +/-10kb**

|             | TF    | TAD count |      |       |     | TAD proportion (from total) |      |       |      |
|-------------|-------|-----------|------|-------|-----|-----------------------------|------|-------|------|
|             |       | any       | Pita | ZIPIC | Zw5 | any                         | Pita | ZIPIC | Zw5  |
| Bg3 (580)   | Pita  | 170       | 109  | 67    | 97  | 0,29                        | 0,19 | 0,12  | 0,17 |
|             | ZIPIC | 79        | 67   | 21    | 37  | 0,14                        | 0,12 | 0,04  | 0,06 |
|             | Zw5   | 110       | 97   | 37    | 30  | 0,19                        | 0,17 | 0,06  | 0,05 |
|             | Pita  | 184       | 114  | 80    | 102 | 0,32                        | 0,20 | 0,14  | 0,18 |
| Kc167 (582) | ZIPIC | 96        | 80   | 22    | 45  | 0,16                        | 0,14 | 0,04  | 0,08 |
|             | Zw5   | 119       | 102  | 45    | 36  | 0,20                        | 0,18 | 0,08  | 0,06 |
|             | Pita  | 174       | 107  | 82    | 90  | 0,30                        | 0,19 | 0,14  | 0,16 |
| OSC (577)   | ZIPIC | 95        | 82   | 22    | 42  | 0,16                        | 0,14 | 0,04  | 0,07 |
|             | Zw5   | 109       | 90   | 42    | 27  | 0,19                        | 0,16 | 0,07  | 0,05 |
|             | Pita  | 155       | 103  | 63    | 89  | 0,27                        | 0,18 | 0,11  | 0,15 |
| S2 (583)    | ZIPIC | 77        | 63   | 16    | 36  | 0,13                        | 0,11 | 0,03  | 0,06 |
|             | Zw5   | 106       | 89   | 36    | 25  | 0,18                        | 0,15 | 0,06  | 0,04 |
|             | Pita  | 155       | 103  | 63    | 89  | 0,27                        | 0,18 | 0,11  | 0,15 |
